# Supplementary material for: A Triple-Regulated Oncolytic Adenovirus Carrying MicroRNA-143 Exhibits Potent Antitumor Efficacy in Colorectal Cancer
Source: PubMed Central journal article supplement — Mol Ther Oncolytics. 2020 Jan 25;16:219–29. doi: 10.1016/j.omto.2020.01.005 (PMC7036723; doi:10.1016/j.omto.2020.01.005), 2020-01-25
Supplement: mmc1.pdf [file mmc1.pdf]

**OMTO, Volume 16**

**Supplemental Information**

**A Triple-Regulated Oncolytic Adenovirus  
Carrying MicroRNA-143 Exhibits Potent  
Antitumor Efficacy in Colorectal Cancer**

**Qifeng Luo, Hongming Song, Xiaochong Deng, Jiayi Li, Wei Jian, Junyong Zhao, Xueyu Zheng, Shiva Basnet, Haiyan Ge, Twingle Daniel, Bin Xu, and Lin Fang**

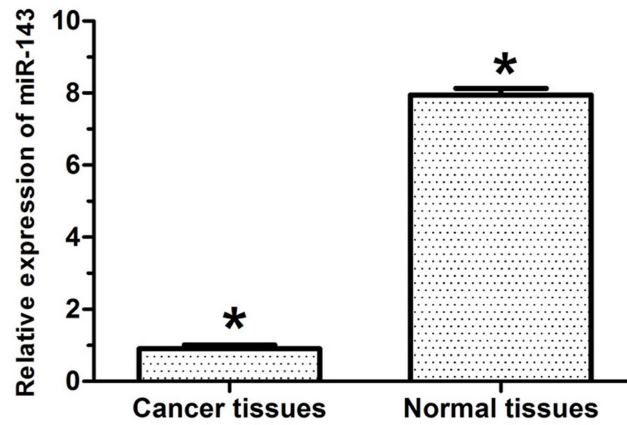

**a**

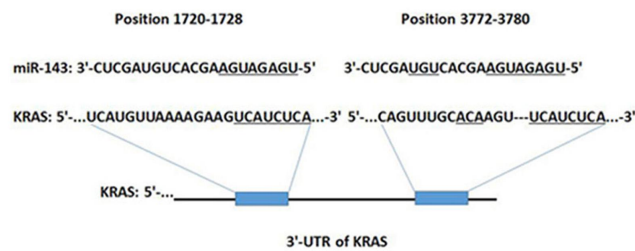

**b**

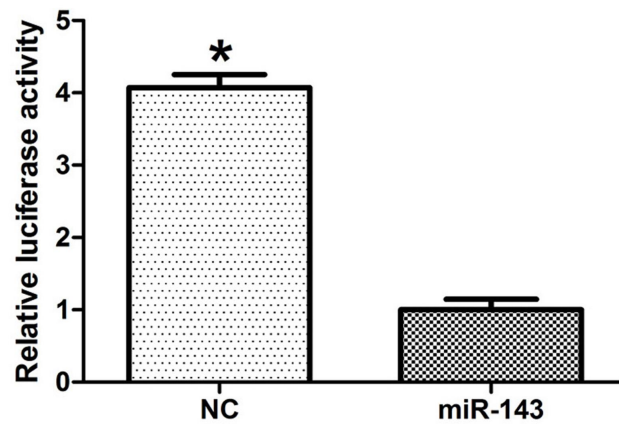

**c**

**Figure.s1 The expression of miR-143 in patients with CRC and its targeted gene.**  
**a** The expression of miR-143 in CRC specimens was measured by qRT-PCR. **b** The binding sites for miR-143 in the 3'-UTR of KRAS mRNA. **c** The relative luciferase activity in miR-143 group and NC group. \* $P < 0.05$ .
